# Supplementary material for: Lymphoma in Border Collies: Genome-Wide Association and Pedigree Analysis
Source: MDPI journal article supplement (doi:10.3390/vetsci10090581), 2023-09-19
Supplement: s1 [file s1]

## SUPPLEMENTARY DATA

Supplementary Data S1. Details for (A) genotyped dogs, and (B) lymphoma-affected dogs

### (A) Genotyped dogs

| DogID     | Genotype ID | Lymphoma | Sex | Sire      | Dam       | Year of birth |
|-----------|-------------|----------|-----|-----------|-----------|---------------|
| dog_45527 | B1          |          | F   | dog_45405 | dog_45433 | 2003          |
| dog_63658 | B10         |          | M   | dog_50712 | dog_28335 | 2008          |
| dog_70670 | B11         |          | F   | dog_56199 | dog_8197  | 1999          |
| dog_63659 | B12         |          | F   | dog_50712 | dog_28335 | 2008          |
| dog_51018 | B13         |          | F   | dog_50743 | dog_20043 | 2008          |
| dog_62810 | B3          |          | F   | dog_51768 | dog_16498 | 2001          |
| dog_51015 | B15         |          | F   | dog_50743 | dog_20043 | 2008          |
| dog_64294 | B16         |          | F   | dog_52123 | dog_46413 | NA            |
| dog_66825 | B17         |          |     | dog_11388 | dog_5121  | 2003          |
| dog_71936 | B18         |          | F   | dog_2929  | dog_71929 |               |
| dog_65970 | B19         |          | F   | dog_43742 | dog_51271 | 2008          |
| dog_45472 | B2          |          | M   | dog_16360 | dog_59900 | 1997          |
| dog_65971 | B20         |          | M   | dog_43742 | dog_51271 | 2008          |
| dog_21402 | B21         |          | F   | dog_26336 | dog_21106 | 2006          |
| dog_67774 | B22         |          |     | dog_67767 | dog_68029 | NA            |
| dog_60438 | B23         |          | F   | dog_8279  | dog_48974 | 2007          |
| dog_33573 | B24         |          | F   | dog_16128 | dog_56091 | 2002          |
| dog_35051 | B25         |          | F   | dog_76305 | dog_33124 | 2007          |
| dog_32328 | B26         |          | M   | dog_37744 | dog_26960 | 2008          |
| dog_59021 | B35         |          | M   | dog_83464 | dog_58773 | 2010          |
| dog_20940 | B28         |          |     |           |           | 2009          |
| dog_64264 | B29         |          | M   | dog_64506 | dog_63118 | 2005          |
| dog_45502 | PBC11       |          | F   | dog_1728  | dog_45435 | 2002          |
| dog_14762 | PBC01       |          | F   | dog_1352  | dog_1373  | 1995          |
| dog_3819  | B31         | No       | M   | dog_2535  | dog_2554  | 2009          |
| dog_40138 | B32         |          | M   | dog_40324 | dog_81186 | 2009          |
| dog_40470 | B33         |          | M   | dog_40324 | dog_81186 | 2009          |
| dog_57834 | B34         |          | M   | dog_37301 | dog_57832 | 2007          |
| dog_78557 | B36         |          | M   | dog_4189  | dog_76250 | 2010          |
| dog_70671 | B43         |          | F   | dog_56199 | dog_8197  | 1999          |
| dog_38609 | B38         |          | F   | dog_16437 | dog_38608 | 2004          |
| dog_15401 | B39         |          | M   | dog_2540  | dog_4019  | 2001          |
| dog_74189 | B4          |          | M   | dog_39166 | dog_31890 | 2002          |
| dog_15397 | B40         |          | F   | dog_81117 | dog_70669 | 2001          |
| dog_70669 | B41         |          | F   | dog_56199 | dog_52097 | 1998          |

| DogID     | Genotype ID | Lymphoma | Sex | Sire      | Dam       | Year of birth |
|-----------|-------------|----------|-----|-----------|-----------|---------------|
| dog_80869 | B42         |          | M   | dog_38061 | dog_80868 | 2003          |
| dog_37595 | B44         |          | F   | dog_41530 | dog_7859  | 2006          |
| dog_39525 | B5          |          | F   | dog_2451  | dog_52663 |               |
| dog_56199 | B6          |          | M   | dog_1964  | dog_56538 | 1995          |
| dog_63657 | B7          |          | M   | dog_50712 | dog_28335 | 2008          |
| dog_63656 | B8          |          | F   | dog_50712 | dog_28335 | 2008          |
| dog_39216 | B9          |          | M   | dog_24350 | dog_24351 | 1997          |
| dog_2208  | BC1         | Yes      | F   | dog_2202  | dog_2207  | 2010          |
| dog_58840 | BC10        |          | F   | dog_1368  | dog_58890 | 2013          |
| dog_58783 | BC11        |          | F   | dog_58886 | dog_58784 | 2012          |
| dog_12390 | BC12        |          | M   | dog_82666 | dog_40569 | 2014          |
| dog_26887 | BC13        |          | F   | dog_3662  | dog_69176 | 2012          |
| dog_27639 | BC14        |          | M   | dog_3819  | dog_27646 | 2013          |
| dog_21687 | BC15        |          | M   | dog_7964  | dog_61146 | 2009          |
| dog_6186  | BC16        |          |     | dog_3360  | dog_43465 | 2010          |
| dog_29765 | BC17        |          | M   |           |           |               |
| dog_34459 | BC18        |          | M   |           |           | 2012          |
| dog_52215 | BC19        |          | F   | dog_47453 | dog_54734 | 2014          |
| dog_28663 | BC2         | Yes      | F   | dog_14936 | dog_28655 | 2008          |
| dog_8231  | BC3         |          | F   | dog_42999 | dog_32054 |               |
| dog_58820 | BC4         |          | F   | dog_58917 | dog_58772 | 2012          |
| dog_61258 | BC5         |          | M   | dog_78943 | dog_55630 | 2009          |
| dog_31594 | BC6         |          | M   | dog_2459  | dog_68029 | 2010          |
| dog_58756 | BC7         |          | M   | dog_58886 | dog_58812 | 2013          |
| dog_59020 | BC8         |          | M   | dog_83464 | dog_58773 | 2010          |
| dog_27550 | BC9         |          | M   | dog_3820  | dog_3821  | 2012          |
| dog_2054  | PBC02       |          | F   | dog_950   | dog_2053  | 1997          |
| dog_2781  | PBC07       |          | M   | dog_1350  | dog_2779  | 1996          |
| dog_27710 | PBC03       |          | F   | dog_2555  | dog_27736 | 2012          |
| dog_58956 | PBC04       |          | F   |           |           |               |
| dog_51235 | PBC216      | Yes      | M   |           |           | 2017          |
| dog_8758  | PBC06       | Yes      | M   |           |           | 2003          |
| dog_27936 | PBC107      |          | F   | dog_3739  | dog_35435 | 2000          |
| dog_64553 | PBC08       |          | M   | dog_64653 | dog_81269 | 2004          |
| dog_10584 | PBC09       |          | F   | dog_42539 | dog_24580 | 2010          |
| dog_67215 | PBC097      | Yes      | M   |           |           | 2004          |
| dog_2624  | PBC100      | Yes      | F   | dog_2502  | dog_2623  | 2013          |
| dog_2619  | PBC099      | Yes      | M   | dog_2556  | dog_2566  | 2008          |
| dog_54769 | PBC10       |          | F   | dog_75960 | dog_3890  | 2013          |
| dog_53836 | PBC098      | Yes      | F   |           |           | 2009          |

| DogID     | Genotype ID | Lymphoma | Sex | Sire      | Dam       | Year of birth |
|-----------|-------------|----------|-----|-----------|-----------|---------------|
| dog_2629  | PBC162      | Yes      | F   | dog_2599  | dog_2628  | 2009          |
| dog_2634  | PBC157      | Yes      | M   | dog_2573  | dog_2617  | 2009          |
| dog_2373  | PBC103      | Yes      | M   | dog_2309  | dog_2372  | 2002          |
| dog_2557  | PBC104      | Yes      | F   | dog_2463  | dog_2466  | 1997          |
| dog_2199  | PBC109      |          | M   | dog_2195  | dog_2092  | 2002          |
| dog_2555  | PBC110      |          | M   | dog_2453  | dog_2548  | 2004          |
| dog_2311  | PBC169      |          | F   | dog_1381  | dog_2055  | 1993          |
| dog_2521  | PBC177      |          | M   | dog_2463  | dog_2520  | 1998          |
| dog_951   | PBC122      |          | M   | dog_947   | dog_945   | 1992          |
| dog_1986  | PBC184      |          | M   | dog_1965  | dog_953   | 1997          |
| dog_1365  | PBC180      |          | F   | dog_80951 | dog_1329  | 1991          |
| dog_2315  | PBC125      |          | M   | dog_2313  | dog_952   | 1999          |
| dog_51019 | B14         |          | M   | dog_50743 | dog_20043 | 2008          |
| dog_74020 | PBC108      |          | F   | dog_14936 | dog_74024 | 2012          |
| dog_3761  | PBC114      |          | M   | dog_2787  | dog_2372  | 2000          |
| dog_75982 | PBC115      |          | M   | dog_3761  | dog_3926  | 2011          |
| dog_3821  | PBC152      | No       | F   | dog_2780  | dog_2612  | 2005          |
| dog_32918 | PBC16       |          | F   | dog_1351  | dog_37661 | 2001          |
| dog_18068 | PBC118      |          | F   | dog_14546 | dog_2746  | 2004          |
| dog_67880 | PBC32       |          | F   | dog_44458 | dog_2279  | 2011          |
| dog_64578 | PBC12       |          | M   | dog_64626 | dog_81216 | 2004          |
| dog_72407 | PBC91       |          | M   | dog_2631  | dog_14913 | 2006          |
| dog_24990 | PBC135      |          | F   | dog_2579  | dog_3791  | 2009          |
| dog_2782  | PBC112      |          | F   | dog_2781  | dog_1374  | 2000          |
| dog_27575 | PBC113      |          | F   | dog_2315  | dog_1374  | 2003          |
| dog_17516 | PBC117      |          | F   | dog_2373  | dog_18068 | 2011          |
| dog_81266 | PBC120      |          | M   | dog_3761  | dog_2585  | 2008          |
| dog_1919  | PBC123      |          | M   | dog_1913  | dog_1912  | 1991          |
| dog_2174  | PBC124      |          | F   | dog_1913  | dog_1924  | 1991          |
| dog_59266 | PBC134      |          | F   | dog_2635  | dog_30395 | 2009          |
| dog_27574 | PBC138      |          | F   | dog_3800  | dog_1374  | 2005          |
| dog_44704 | PBC13       |          | F   | dog_3705  | dog_27649 | 2012          |
| dog_3820  | PBC139      | No       | M   | dog_3800  | dog_1374  | 2005          |
| dog_48468 | PBC166      |          | F   | dog_3882  | dog_2629  | 2011          |
| dog_79349 | PBC132      |          | F   | dog_3808  | dog_31573 | 2011          |
| dog_3706  | PBC133      | No       | F   | dog_3705  | dog_2783  | 2009          |
| dog_28655 | PBC105      |          | F   | dog_2781  | dog_27936 | 2004          |
| dog_14936 | PBC106      |          | M   | dog_2854  | dog_14762 | 2004          |
| dog_2384  | PBC126      | No       | M   | dog_2376  | dog_2383  | 1990          |
| dog_28656 | PBC137      |          | M   | dog_2459  | dog_27936 | 2006          |

| DogID     | Genotype ID | Lymphoma | Sex | Sire      | Dam       | Year of birth |
|-----------|-------------|----------|-----|-----------|-----------|---------------|
| dog_2586  | PBC130      |          | F   | dog_1986  | dog_2052  | 2003          |
| dog_2583  | PBC172      |          | F   | dog_1444  | dog_2582  | 2001          |
| dog_44746 | PBC14       |          | M   | dog_3705  | dog_27649 | 2012          |
| dog_28043 | PBC140      |          | F   | dog_37667 | dog_37626 | 2011          |
| dog_3818  | PBC141      | No       | F   | dog_3662  | dog_3789  | 2012          |
| dog_7770  | PBC142      |          | M   | dog_2929  | dog_82702 | 2005          |
| dog_3756  | PBC143      | No       | F   | dog_3755  | dog_3277  | 2011          |
| dog_40477 | PBC144      |          | F   | dog_30590 | dog_40491 | 2012          |
| dog_83943 | PBC145      |          | F   | dog_82701 | dog_69189 | 2012          |
| dog_68158 | PBC146      |          | M   | dog_3119  | dog_71460 | 2008          |
| dog_24661 | PBC147      |          | F   | dog_3586  | dog_24652 | 2010          |
| dog_53847 | PBC148      |          | F   | dog_21483 | dog_53846 | 2011          |
| dog_70570 | PBC229      |          | M   | dog_62813 | dog_70562 | 2012          |
| dog_46131 | PBC15       |          | M   | dog_44746 | dog_46106 | 2014          |
| dog_72408 | PBC150      |          | F   | dog_27662 | dog_72411 | 2013          |
| dog_2540  | PBC173      |          | M   | dog_1351  | dog_1365  | 1998          |
| dog_1368  | PBC111      |          | M   | dog_911   | dog_1365  | 1993          |
| dog_67662 | PBC153      |          | M   | dog_67975 | dog_68069 | 2011          |
| dog_13545 | PBC154      |          | M   | dog_25056 | dog_11665 | 2009          |
| dog_71131 | PBC155      |          | F   | dog_10017 | dog_56764 | 2011          |
| dog_52791 | PBC156      |          | F   | dog_36661 | dog_6068  | 2010          |
| dog_68422 | PBC163      | Yes      | F   |           |           | 2008          |
| dog_2609  | PBC158      | Yes      | M   | dog_2308  | dog_2608  | 2007          |
| dog_2618  | PBC159      | Yes      | F   | dog_1660  | dog_2156  | 2005          |
| dog_2150  | PBC168      |          | M   | dog_2139  | dog_2149  | 2000          |
| dog_27418 | PBC160      | Yes      | F   |           |           | 2012          |
| dog_58091 | PBC161      | Yes      | M   |           |           | 2008          |
| dog_38666 | PBC218      | Yes      | M   |           |           | 2010          |
| dog_2446  | PBC05       | Yes      | F   | dog_2430  | dog_2444  | 2005          |
| dog_2622  | PBC164      | Yes      | F   | dog_2458  | dog_2621  | 2002          |
| dog_5456  | PBC165      | Yes      | F   |           |           | 2004          |
| dog_2308  | PBC170      |          | M   | dog_2307  | dog_2306  | 1998          |
| dog_3882  | PBC167      | No       | M   | dog_3586  | dog_3878  | 2007          |
| dog_2608  | PBC171      |          | F   | dog_2504  | dog_2482  | 2005          |
| dog_1658  | PBC178      |          | M   | dog_1483  | dog_1580  | 1994          |
| dog_13183 | PBC17       |          | F   | dog_13214 | dog_13179 | 2011          |
| dog_2430  | PBC129      |          | M   | dog_2141  | dog_2424  | 2000          |
| dog_79429 | PBC121      |          | F   | dog_3808  | dog_31573 | 2011          |
| dog_48833 | PBC136      |          | F   | dog_24378 | dog_2509  | 2013          |
| dog_3234  | PBC116      |          | M   | dog_2309  | dog_2372  | 2002          |

| DogID     | Genotype ID | Lymphoma | Sex | Sire      | Dam       | Year of birth |
|-----------|-------------|----------|-----|-----------|-----------|---------------|
| dog_10708 | PBC174      |          | F   | dog_55234 | dog_8145  | 2013          |
| dog_28657 | PBC175      |          | F   | dog_2459  | dog_27936 | 2006          |
| dog_27553 | PBC176      |          | F   | dog_3796  | dog_3821  | 2009          |
| dog_43714 | PBC119      |          | M   | dog_2463  | dog_2466  | 1997          |
| dog_45763 | PBC127      |          | F   | dog_1973  | dog_1722  | 2001          |
| dog_68625 | PBC179      |          | F   | dog_2599  | dog_2628  | 2009          |
| dog_81434 | PBC18       |          | F   | dog_81476 | dog_81515 | 2009          |
| dog_10852 | PBC131      |          | F   | dog_2530  | dog_2559  | 2002          |
| dog_2638  | PBC181      | Yes      | M   | dog_2579  | dog_2637  | 2008          |
| dog_9938  | PBC182      | Yes      | M   |           |           | 2006          |
| dog_47270 | PBC183      | Yes      | M   |           |           | 2008          |
| dog_3420  | PBC128      |          | F   | dog_2430  | dog_2444  | 2004          |
| dog_3063  | PBC185      | No       | M   | dog_3061  | dog_3060  | 1992          |
| dog_3770  | PBC186      |          | M   | dog_3739  | dog_3023  | 1995          |
| dog_3072  | PBC187      | No       | M   | dog_1730  | dog_2167  | 1989          |
| dog_83455 | PBC188      | Yes      | F   | dog_70570 | dog_83443 | 2014          |
| dog_42023 | PBC189      | Yes      | F   |           |           | 2007          |
| dog_67514 | PBC19       |          | M   | dog_67506 | dog_62026 | 2004          |
| dog_78248 | PBC190      | Yes      | F   | dog_58640 | dog_40701 | 2011          |
| dog_25130 | PBC191      | Yes      | M   |           |           | 2008          |
| dog_4429  | PBC192      | Yes      | F   | dog_4431  | dog_4537  | 2010          |
| dog_33205 | PBC193      | Yes      | M   |           |           | 2011          |
| dog_26886 | PBC194      |          | F   | dog_3662  | dog_69176 | 2014          |
| dog_28042 | PBC195      |          | M   | dog_76668 | dog_26887 | 2015          |
| dog_28666 | PBC196      |          | F   | dog_24524 | dog_28657 | 2011          |
| dog_28670 | PBC197      |          | F   | dog_45782 | dog_28666 | 2015          |
| dog_26656 | PBC198      |          |     |           |           | 2012          |
| dog_60480 | PBC199      |          | M   |           |           | 2015          |
| dog_81513 | PBC20       |          | F   | dog_81547 | dog_81515 | 2010          |
| dog_27540 | PBC200      |          | M   | dog_3820  | dog_3706  | 2014          |
| dog_27546 | PBC201      |          | F   | dog_72593 | dog_27602 | 2015          |
| dog_59945 | PBC202      |          | M   | dog_63204 | dog_11122 | 2016          |
| dog_59949 | PBC203      |          | F   | dog_63204 | dog_11122 | 2016          |
| dog_59948 | PBC204      |          | M   | dog_11121 | dog_11122 | 2014          |
| dog_11122 | PBC205      |          | F   | dog_60141 | dog_45891 | 2011          |
| dog_11121 | PBC206      |          | M   | dog_8789  | dog_33345 | 2009          |
| dog_59947 | PBC207      |          | F   | dog_11121 | dog_11122 | 2014          |
| dog_59944 | PBC208      |          | F   | dog_20979 | dog_11122 | 2013          |
| dog_59946 | PBC209      |          | M   | dog_20979 | dog_11122 | 2013          |
| dog_12065 | PBC21       |          | M   | dog_78366 | dog_12066 | 2012          |

| DogID     | Genotype ID | Lymphoma | Sex | Sire      | Dam       | Year of birth |
|-----------|-------------|----------|-----|-----------|-----------|---------------|
| dog_33172 | PBC210      |          | M   |           |           | 2011          |
| dog_69898 | PBC211      |          | F   | dog_69932 | dog_79388 | 2016          |
| dog_72411 | PBC212      |          | F   | dog_2631  | dog_14913 | 2006          |
| dog_2783  | PBC213      |          | F   | dog_1377  | dog_2782  | 2003          |
| dog_13339 | PBC214      | Yes      | F   | dog_18222 | dog_13422 | 2008          |
| dog_13422 | PBC215      | Yes      | F   | dog_2361  | dog_3678  | 2006          |
| dog_1370  | PBC101      | Yes      | F   | dog_1368  | dog_1367  | 1995          |
| dog_6612  | PBC217      | Yes      | F   | dog_2150  | dog_6307  | 2007          |
| dog_1374  | PBC102      | Yes      | F   | dog_1351  | dog_1370  | 1997          |
| dog_84063 | PBC228      | Yes      | M   |           |           | 2007          |
| dog_39723 | PBC22       |          | F   | dog_57664 | dog_39692 | 2008          |
| dog_6307  | PBC220      |          | F   | dog_2141  | dog_6572  | 2000          |
| dog_29008 | PBC221      |          | M   | dog_28953 | dog_28925 |               |
| dog_24693 | PBC222      |          | M   | dog_54836 | dog_12404 | 1997          |
| dog_74713 | PBC223      |          | F   | dog_29034 | dog_33386 |               |
| dog_59937 | PBC224      |          | F   | dog_54836 | dog_59930 | 1998          |
| dog_6754  | PBC225      |          | M   | dog_3381  | dog_3353  | 2002          |
| dog_37960 | PBC226      |          | M   | dog_16360 | dog_2257  | 1994          |
| dog_84004 | PBC227      | Yes      | M   | dog_4907  | dog_59711 | 2008          |
| dog_23911 | PBC219      | Yes      | M   |           |           | 2006          |
| dog_82888 | B30         |          | M   | dog_36129 | dog_82880 | 2011          |
| dog_67122 | PBC23       |          | F   | dog_3628  | dog_69064 | 2012          |
| dog_23346 | PBC230      |          | F   | dog_50125 | dog_23349 | 2004          |
| dog_8893  | PBC24       |          | F   | dog_82020 | dog_40438 | 2014          |
| dog_3627  | PBC25       |          | M   | dog_858   | dog_3346  | 1996          |
| dog_77493 | PBC26       |          | F   | dog_2313  | dog_77551 | 2007          |
| dog_4586  | PBC27       |          | M   | dog_76827 | dog_39694 | 2009          |
| dog_78403 | PBC28       |          |     |           |           | 2014          |
| dog_78402 | PBC29       |          |     |           |           | 2011          |
| dog_71922 | PBC30       |          | M   | dog_3866  | dog_71936 | 2011          |
| dog_54082 | PBC149      |          | F   | dog_54084 | dog_82970 | 2006          |
| dog_31133 | PBC151      |          | M   | dog_60464 | dog_60462 | 2011          |
| dog_31606 | PBC31       |          | M   | dog_19177 | dog_5985  | 2013          |
| dog_57963 | PBC34       |          | M   |           |           | 2012          |
| dog_74385 | PBC35       |          | F   |           |           | 2013          |
| dog_60437 | PBC33       |          | F   | dog_60436 | dog_60439 | 2012          |
| dog_67148 | PBC36       |          | M   | dog_79713 | dog_60459 | 2014          |
| dog_70164 | PBC38       |          | F   |           |           | 1995          |
| dog_50771 | PBC39       |          | M   |           |           | 1995          |
| dog_77145 | PBC40       |          | F   | dog_1872  | dog_77045 | 2010          |

| DogID     | Genotype ID | Lymphoma | Sex | Sire      | Dam       | Year of birth |
|-----------|-------------|----------|-----|-----------|-----------|---------------|
| dog_60463 | PBC37       |          | F   | dog_78362 | dog_29404 | 2010          |
| dog_30736 | PBC41       |          | M   | dog_36129 | dog_30738 | 2011          |
| dog_64024 | PBC42       |          | F   | dog_64025 | dog_60454 | 2011          |
| dog_60455 | PBC43       |          | F   | dog_47188 | dog_36117 | 2011          |
| dog_76110 | PBC44       |          | M   | dog_18696 | dog_76109 | 2008          |
| dog_31574 | PBC46       |          | M   | dog_2459  | dog_12507 | 2005          |
| dog_54776 | PBC47       |          | F   | dog_2535  | dog_54737 | 2013          |
| dog_45350 | PBC48       |          | M   | dog_45304 | dog_45267 | 2010          |
| dog_58187 | PBC45       |          | F   | dog_48910 | dog_26634 | 2008          |
| dog_58782 | PBC50       |          | M   | dog_2985  | dog_1918  | 2003          |
| dog_66979 | PBC51       |          | F   | dog_3540  | dog_80834 | 2003          |
| dog_28632 | PBC52       |          | F   | dog_28602 | dog_28610 | 2002          |
| dog_66434 | PBC53       |          | M   | dog_18187 | dog_3541  | 2008          |
| dog_59006 | PBC54       |          | M   | dog_58971 | dog_62824 | 2009          |
| dog_62824 | PBC55       |          | F   | dog_1921  | dog_62819 | 2005          |
| dog_40422 | PBC56       |          | F   | dog_2277  | dog_40431 | 2009          |
| dog_58917 | PBC57       |          | M   | dog_62828 | dog_62824 | 2006          |
| dog_60310 | PBC58       |          | M   | dog_57220 | dog_60309 | 2011          |
| dog_6196  | PBC59       |          | F   | dog_3360  | dog_3409  | 2009          |
| dog_58379 | PBC60       |          | F   | dog_44519 | dog_42664 | 2012          |
| dog_73865 | PBC61       |          | M   | dog_64996 | dog_46792 | 2011          |
| dog_28479 | PBC62       |          | F   | dog_3545  | dog_3456  | 2012          |
| dog_10507 | PBC63       |          | F   | dog_58878 | dog_11545 | 2012          |
| dog_66867 | PBC64       |          | M   | dog_66929 | dog_66861 | 2011          |
| dog_6499  | PBC65       |          | F   | dog_4222  | dog_6870  | 2011          |
| dog_47849 | PBC66       |          | F   | dog_47868 | dog_47858 | 2010          |
| dog_69171 | PBC67       |          | M   | dog_55234 | dog_69191 | 2011          |
| dog_54805 | PBC68       |          | M   | dog_75960 | dog_3890  | 2013          |
| dog_6650  | PBC69       |          | M   | dog_40441 | dog_6611  | 2012          |
| dog_58888 | PBC70       |          | F   | dog_58886 | dog_17480 | 2012          |
| dog_79388 | PBC71       |          | F   | dog_3808  | dog_31573 | 2013          |
| dog_42641 | PBC72       |          | M   | dog_3603  | dog_42661 | 2012          |
| dog_61248 | PBC73       |          | M   | dog_51210 | dog_13505 | 2011          |
| dog_40569 | PBC74       |          | F   | dog_77147 | dog_77336 | 2012          |
| dog_73855 | PBC75       |          | M   | dog_73861 | dog_73863 | 2014          |
| dog_3816  | PBC76       |          | M   | dog_3721  | dog_3717  | 2013          |
| dog_45782 | PBC77       |          | M   | dog_28055 | dog_45785 | 2012          |
| dog_79949 | PBC78       |          | M   | dog_20956 | dog_31603 | 2014          |
| dog_79927 | PBC79       |          | M   | dog_20956 | dog_31603 | 2014          |
| dog_26963 | PBC80       |          | M   | dog_24554 | dog_50928 | 2011          |

| DogID     | Genotype ID | Lymphoma | Sex | Sire      | Dam       | Year of birth |
|-----------|-------------|----------|-----|-----------|-----------|---------------|
| dog_44947 | PBC81       |          | F   | dog_3868  | dog_44918 | 2010          |
| dog_44946 | PBC82       |          | M   | dog_41765 | dog_3451  | 2010          |
| dog_9699  | PBC49       |          | F   | dog_10017 | dog_56764 | 2011          |
| dog_3823  | PBC84       | No       | M   | dog_3820  | dog_3706  | 2014          |
| dog_83021 | PBC85       |          | M   | dog_3705  | dog_27724 | 2016          |
| dog_83023 | PBC86       |          | F   | dog_3705  | dog_27724 | 2016          |
| dog_83019 | PBC87       |          | F   | dog_3705  | dog_27724 | 2016          |
| dog_83022 | PBC88       |          | F   | dog_3705  | dog_27724 | 2016          |
| dog_32793 | PBC89       |          | M   | dog_62550 | dog_38685 | 2013          |
| dog_72410 | PBC90       |          | M   | dog_3705  | dog_72411 | 2011          |
| dog_55778 | PBC83       |          | F   | dog_9700  | dog_79073 | 2013          |
| dog_14972 | PBC92       |          | M   | dog_14947 | dog_27515 | 2013          |
| dog_75629 | PBC93       |          | F   | dog_75628 | dog_75608 | 2012          |
| dog_77263 | PBC94       |          | F   | dog_63218 | dog_77002 | 2012          |
| dog_77336 | PBC95       |          | F   | dog_2309  | dog_77144 | 2006          |
| dog_79512 | PBC96       |          | M   | dog_59274 | dog_79429 | 2014          |



## Supplementary Data S1 (continued)

## (B) Lymphoma-affected dogs

| Dog ID    | Genotype ID | Sex | Sire      | Dam       | Year of birth | Age diagnosed | Lymphoma type | Stage | Grade | Localisation | Treatment                    | Treatment outcome                    | Age of death |
|-----------|-------------|-----|-----------|-----------|---------------|---------------|---------------|-------|-------|--------------|------------------------------|--------------------------------------|--------------|
| dog_2208  | BC1         | F   | dog_2202  | dog_2207  | 2010          | 3y6m          | B-cell        | I     | Low   | Multicentric | Chemotherapy                 | Recurrence                           |              |
| dog_4429  | PBC192      | F   | dog_4431  | dog_4537  | 2010          | 8y2m          | Unknown type  |       |       |              | Chemotherapy                 | Complete remission                   |              |
| dog_2286  |             | F   | dog_1512  | dog_2285  | 2001          | 12y10m        | Unknown type  |       |       | Multicentric | Palliative                   |                                      | 13y2m        |
| dog_6612  | PBC217      | F   | dog_2150  | dog_6307  | 2007          | 12y           | B-cell        |       |       |              | Chemotherapy                 | Still undergoing treatment           |              |
| dog_8758  | PBC06       | M   |           |           | 2003          | 12y8m         | T-cell        | V     | High  | Cutaneous    | Chemotherapy                 | Partial remission                    | 12y11m       |
| dog_1751  |             | F   | dog_904   | dog_1745  | 1984          | 11y           | Unknown type  | V     |       | Alimentary   | No treatment                 |                                      | 11y          |
| dog_9672  |             | M   |           |           | 1900          | 5y            | Unknown type  |       | High  | Multicentric | Unknown                      |                                      | 6y           |
| dog_9938  | PBC182      | M   |           |           | 2006          | 10y11m        | B-cell        | III   | High  | Multicentric | Chemotherapy                 | Partial remission                    |              |
| dog_2558  |             | M   | dog_2313  | dog_2392  | 1998          | 9y10m         | Unknown type  |       |       | Alimentary   | Unknown                      |                                      | 10y          |
| dog_2560  |             | F   | dog_2530  | dog_2559  | 2002          | 11y2m         | B-cell        | I     | Low   | Multicentric | Chemotherapy                 |                                      | 11y6m        |
| dog_13339 | PBC214      | F   | dog_18222 | dog_13422 | 2008          | 8y1m          | T-cell        |       |       | Cutaneous    | Chemotherapy                 | Replaced, still undergoing treatment |              |
| dog_13422 | PBC215      | F   | dog_2361  | dog_3678  | 2006          | 9y6m          | Unknown type  |       |       | Multicentric | Chemotherapy                 | Complete remission                   |              |
| dog_13511 |             | M   | dog_2361  | dog_3678  | 2006          | 7y10m         | Unknown type  |       |       | Cutaneous    | Chemotherapy then palliative |                                      | 8y           |
| dog_84004 | PBC227      | M   | dog_4907  | dog_59711 | 2008          | 11y           | B-cell        |       |       | Multicentric | Unknown                      |                                      |              |
| dog_2604  |             | M   | dog_1920  | dog_2603  | 2002          | 12y3m         | B-cell        | III   | High  | Multicentric | Chemotherapy                 |                                      | 12y7m        |
| dog_1913  |             | M   | dog_928   | dog_1908  | 1985          | 12y10m        | Unknown type  |       |       |              | Palliative                   |                                      | 13y          |
| dog_22693 |             | F   |           |           | 1998          | 12y6m         | Unknown type  | V     | High  | Multicentric | Palliative                   |                                      | 12y7m        |
| dog_23911 | PBC219      | M   |           |           | 2006          | 13y4m         | Unknown type  |       |       |              | Palliative                   |                                      |              |

| Dog ID    | Genotype ID | Sex | Sire      | Dam       | Year of birth | Age diagnosed | Lymphoma type               | Stage | Grade        | Localisation | Treatment    | Treatment outcome          | Age of death |
|-----------|-------------|-----|-----------|-----------|---------------|---------------|-----------------------------|-------|--------------|--------------|--------------|----------------------------|--------------|
| dog_27418 | PBC160      | F   |           |           | 2012          | 5y1m          | B-cell                      |       | High         | Multicentric | Chemotherapy | Still undergoing treatment |              |
| dog_1374  | PBC102      | F   | dog_1351  | dog_1370  | 1997          | 13y           | Unknown type                | I     | Low          |              | Palliative   |                            | 14y          |
| dog_28663 | BC2         | F   | dog_14936 | dog_28655 | 2008          | 6y            | Unknown type                |       |              |              | Unknown      |                            | 6y           |
| dog_30475 |             | F   | dog_33176 | dog_22634 | 2011          | 7y10m         | Unknown type                |       |              |              | Unknown      |                            | 7y10m        |
| dog_2614  |             | M   | dog_2540  | dog_2613  | 2008          | 5y            | Unknown type                |       | High         | Multicentric | Chemotherapy |                            | 6y           |
| dog_31795 |             | M   | dog_30018 | dog_4188  | 2006          | 10y           | Unknown type                |       |              |              | Unknown      |                            | 10y9m        |
| dog_33176 |             | M   | dog_50125 | dog_24226 | 2007          | 4y11m         | Unknown type                |       |              |              | Unknown      |                            | 5y           |
| dog_33205 | PBC193      | M   |           |           | 2011          | 7y3m          | Unknown type                |       |              |              | Chemotherapy | Complete remission         |              |
| dog_38666 | PBC218      | M   |           |           | 2010          | 9y1m          | B-cell                      |       | High         |              | Chemotherapy | Still undergoing treatment |              |
| dog_2587  |             | F   | dog_1658  | dog_2586  | 2006          | 8y            | B-cell                      | III   | Intermediate | Multicentric | Chemotherapy |                            | 9y4m         |
| dog_2468  |             | F   | dog_1788  | dog_2467  | 1993          | 4y6m          | B-cell                      | III   |              | Multicentric | Chemotherapy |                            | 6.5y         |
| dog_40443 |             | F   | dog_17538 | dog_50122 | 2010          | 7y9m          | Unknown type                |       |              |              | Unknown      |                            | 7y9m         |
| dog_2609  | PBC158      | M   | dog_2308  | dog_2608  | 2007          | 11y5m         | B-cell                      | III   | High         | Multicentric | Chemotherapy | Complete remission         |              |
| dog_2618  | PBC159      | F   | dog_1660  | dog_2156  | 2005          | 12y           | T-cell                      | V     |              | Cutaneous    | Unknown      |                            |              |
| dog_42023 | PBC189      | F   |           |           | 2007          | 11y           | Unknown type                | IVb   |              | Multicentric | Palliative   |                            |              |
| dog_2557  | PBC104      | F   | dog_2463  | dog_2466  | 1997          | 9y6m          | Unknown type                | II    |              | Multicentric | Chemotherapy | Euthanased                 | 9y6m         |
| dog_2446  | PBC05       | F   | dog_2430  | dog_2444  | 2005          | 11y           | B-cell                      | III   | High         | Multicentric | Chemotherapy | Complete remission         |              |
| dog_2445  |             | F   | dog_2430  | dog_2444  | 2007          | 7y            | Unknown type                |       |              |              | Unknown      |                            | 8y           |
| dog_2619  | PBC099      | M   | dog_2556  | dog_2566  | 2008          | 9y            | B-cell                      |       |              |              | Chemotherapy | Complete remission         |              |
| dog_2620  |             | M   | dog_1973  | dog_1722  | 2001          | 14y7m         | Chronic large cell lymphoma |       |              |              | No treatment |                            | 15y7m        |
| dog_2622  | PBC164      | F   | dog_2458  | dog_2621  | 2002          | 15y3m         | Unknown type                |       |              |              | Unknown      |                            |              |
| dog_2624  | PBC100      | F   | dog_2502  | dog_2623  | 2013          | 2y11m         | B-cell                      | III   |              | Multicentric | Chemotherapy | Complete remission         |              |

| Dog ID    | Genotype ID | Sex | Sire      | Dam       | Year of birth | Age diagnosed | Lymphoma type | Stage | Grade                | Localisation | Treatment           | Treatment outcome          | Age of death |
|-----------|-------------|-----|-----------|-----------|---------------|---------------|---------------|-------|----------------------|--------------|---------------------|----------------------------|--------------|
| dog_2626  |             | F   | dog_2082  | dog_2625  | 2004          | 3y6m          | Unknown type  |       |                      |              | Unknown             |                            | 4y           |
| dog_2625  |             | F   | dog_2574  | dog_2616  | 2002          | 6y1m          | Unknown type  |       |                      |              | Unknown             |                            | 6y4m         |
| dog_2615  |             | F   | dog_44286 | dog_2399  | 2000          | 4y5m          | Unknown type  |       |                      | Multicentric | No treatment        |                            | 5y           |
| dog_2630  |             | F   | dog_2354  | dog_2515  | 1990          | 11y           | Unknown type  |       |                      | Alimentary   | Surgery             |                            | 12y3m        |
| dog_51235 | PBC216      | M   |           |           | 2017          | 1y11m         | B-cell        | V     | Intermediate to high | Multicentric | Immunotherapy trial | Euthanased                 | 1y11m        |
| dog_2632  |             | F   | dog_2631  | dog_2606  | 2002          | 13y6m         | B-cell        | IV    |                      | Multicentric | Unknown             |                            | 13y8m        |
| dog_2633  |             | F   | dog_1884  | dog_2518  | 2007          | 9y11m         | Unknown type  |       |                      |              | Unknown             |                            | 9y11m        |
| dog_53834 |             | M   | dog_50125 | dog_19509 | 2005          | 4y            | Unknown type  |       |                      |              | Unknown             |                            | 5y           |
| dog_53836 | PBC098      | F   |           |           | 2009          | 3y            | B-cell        |       |                      |              | Unknown             | Complete remission         |              |
| dog_55776 |             | F   |           |           | 2001          | 9y            | Unknown type  | V     |                      |              | Surgery             |                            | 10y          |
| dog_2634  | PBC157      | M   | dog_2573  | dog_2617  | 2009          | 8y1m          | B-cell        |       |                      | Multicentric | Palliative          |                            | 8y2m         |
| dog_58091 | PBC161      | M   |           |           | 2008          | 8y            | B-cell        |       |                      | Multicentric | Chemotherapy        | Still undergoing treatment |              |
| dog_1370  | PBC101      | F   | dog_1368  | dog_1367  | 1995          | 12y           | Unknown type  | I     | Low                  |              | Chemotherapy        | Partial remission          | 13y          |
| dog_2635  |             | M   | dog_2564  | dog_2612  | 2009          | 6y4m          | Unknown type  |       | High                 |              | No treatment        |                            | 6y4m         |
| dog_2636  |             | M   | dog_2384  | dog_2607  | 1994          | 10y           | Unknown type  | IV    |                      | Extranodal   | Chemotherapy        | Partial remission          | 12y          |
| dog_59711 |             | F   | dog_50743 | dog_64539 | 2005          | 11y           | B-cell        |       |                      | Multicentric | Chemotherapy        | Partial remission          | 12y6m        |
| dog_2465  |             | M   | dog_1788  | dog_2462  | 1994          | 13y           | Unknown type  |       |                      | Multicentric | Palliative          |                            | 13y2m        |
| dog_67215 | PBC097      | M   |           |           | 2004          | 13y           | Unknown type  |       |                      |              | Unknown             | Unknown                    |              |
| dog_2281  |             | F   | dog_2280  | dog_2279  | 2006          | 10y9m         | Unknown type  |       |                      | Multicentric | Palliative          |                            |              |
| dog_68422 | PBC163      | F   |           |           | 2008          | 9y            | Unknown type  |       |                      |              | Unknown             | Euthanased                 | 10y          |
| dog_2629  | PBC162      | F   | dog_2599  | dog_2628  | 2009          | 4y            | B-cell        |       |                      | Follicular   | Unknown             | Complete remission         |              |
| dog_2638  | PBC181      | M   | dog_2579  | dog_2637  | 2008          | 9y11m         | B-cell        | IV    | High                 | Multicentric | Chemotherapy        | Partial remission          |              |
| dog_2640  |             | M   | dog_2596  | dog_2639  | 2003          | 6y11m         | Unknown type  | V     | High                 | Multicentric | Unknown             |                            | 7y           |

| Dog ID    | Genotype ID | Sex | Sire      | Dam       | Year of birth | Age diagnosed | Lymphoma type                                        | Stage | Grade | Localisation | Treatment    | Treatment outcome          | Age of death |
|-----------|-------------|-----|-----------|-----------|---------------|---------------|------------------------------------------------------|-------|-------|--------------|--------------|----------------------------|--------------|
| dog_84063 | PBC228      | M   |           |           | 2007          | 13y           | B-cell                                               |       |       |              | Unknown      | Still undergoing treatment |              |
| dog_2585  |             | F   | dog_2584  | dog_2583  | 2004          | 9y5m          | Unknown type                                         |       |       | Cutaneous    | Unknown      |                            | 9y5m         |
| dog_2641  |             | F   | dog_2579  | dog_2541  | 2010          | 5y7m          | B-cell                                               |       | High  | Multicentric | Unknown      |                            | 5y8m         |
| dog_76974 |             | M   | dog_41050 |           | 2001          | 10y           | Unknown type                                         | III   | High  | Cutaneous    | No treatment |                            | 10y          |
| dog_78248 | PBC190      | F   | dog_58640 | dog_40701 | 2011          | 6y8m          | Unknown type                                         | III   |       | Multicentric | Unknown      | Still undergoing treatment |              |
| dog_2645  |             | M   | dog_2644  | dog_2642  | 2011          | 5y            | Unknown type                                         |       |       |              | Unknown      |                            | 6y           |
| dog_2373  | PBC103      | M   | dog_2309  | dog_2372  | 2002          | 9y            | B-cell                                               | IV    |       |              | Chemotherapy | Partial remission          | 9y8m         |
| dog_83455 | PBC188      | F   | dog_70570 | dog_83443 | 2014          | 3y            | Unknown type                                         |       |       |              | Unknown      |                            |              |
| dog_25130 | PBC191      | M   |           |           | 2008          | 7y11m         | Acute lymphocytic leukaemia/Stage V lymphoma         | V     |       |              | Chemotherapy | Complete remission         |              |
| dog_5456  | PBC165      | F   |           |           | 2004          | 13y           | Acute lymphocytic leukaemia/Stage V lymphoma         | V     | High  |              | Unknown      |                            |              |
| dog_47270 | PBC183      | M   |           |           | 2008          | 9y            | T-cell, Acute lymphocytic leukaemia/Stage V lymphoma | Va    |       |              | Unknown      |                            |              |

Supplementary Data S2. REML results for all chromosomes and regions of interest for a prevalence of (A) 0.1, (B) 0.05, and (C) 0.025.

(A) Prevalence 0.1

| Chromosome/Regio<br>n | V(G)<br>Variance | V(G)<br>SE | V(e)<br>Variance | V(e)<br>SE | Vp<br>Variance | Vp SE  | V(G)/Vp<br>Variance | V(G)/Vp<br>SE | V(G)/Vp_<br>L Variance | V(G)/Vp_<br>L SE | LogL   | LogL0  | LRT   | df | Pval     | n   |
|-----------------------|------------------|------------|------------------|------------|----------------|--------|---------------------|---------------|------------------------|------------------|--------|--------|-------|----|----------|-----|
| 1                     | 0.0136           | 0.0193     | 0.1512           | 0.0249     | 0.1648         | 0.0192 | 0.0828              | 0.1161        | 0.1328                 | 0.186            | 57.425 | 57.204 | 0.441 | 1  | 2.53E-01 | 150 |
| 2                     | 0.0228           | 0.0208     | 0.1421           | 0.0237     | 0.1649         | 0.0194 | 0.1385              | 0.1219        | 0.2221                 | 0.196            | 58.08  | 57.204 | 1.751 | 1  | 9.29E-02 | 150 |
| 3                     | 0.0490           | 0.0260     | 0.1186           | 0.0223     | 0.1676         | 0.0209 | 0.2924              | 0.1380        | 0.4690                 | 0.221            | 59.781 | 57.204 | 5.153 | 1  | 1.16E-02 | 150 |
| 4                     | 0.0103           | 0.0157     | 0.1541           | 0.0233     | 0.1644         | 0.0191 | 0.0624              | 0.0952        | 0.1001                 | 0.153            | 57.451 | 57.204 | 0.494 | 1  | 2.41E-01 | 150 |
| 5                     | 0.0495           | 0.0251     | 0.1155           | 0.0224     | 0.1649         | 0.0202 | 0.3000              | 0.1364        | 0.4813                 | 0.219            | 60.232 | 57.204 | 6.056 | 1  | 6.93E-03 | 150 |
| 6                     | 0.0137           | 0.0166     | 0.1510           | 0.0228     | 0.1647         | 0.0192 | 0.0832              | 0.0993        | 0.1334                 | 0.159            | 57.668 | 57.204 | 0.927 | 1  | 1.68E-01 | 150 |
| 7                     | 0.0367           | 0.0235     | 0.1287           | 0.0232     | 0.1654         | 0.0199 | 0.2218              | 0.1326        | 0.3557                 | 0.213            | 58.88  | 57.204 | 3.35  | 1  | 3.36E-02 | 150 |
| 8                     | 0.0083           | 0.0136     | 0.1559           | 0.0223     | 0.1643         | 0.0190 | 0.0506              | 0.0822        | 0.0811                 | 0.132            | 57.504 | 57.204 | 0.6   | 1  | 2.19E-01 | 150 |
| 9                     | 0.0004           | 0.0121     | 0.1647           | 0.0229     | 0.1650         | 0.0191 | 0.0022              | 0.0733        | 0.0035                 | 0.118            | 57.205 | 57.204 | 0.001 | 1  | 4.88E-01 | 150 |
| 10                    | 0.0089           | 0.0135     | 0.1554           | 0.0219     | 0.1643         | 0.0191 | 0.0540              | 0.0814        | 0.0866                 | 0.131            | 57.592 | 57.204 | 0.776 | 1  | 1.89E-01 | 150 |
| 11                    | 0.0219           | 0.0188     | 0.1422           | 0.0228     | 0.1641         | 0.0192 | 0.1337              | 0.1110        | 0.2145                 | 0.178            | 58.179 | 57.204 | 1.949 | 1  | 8.13E-02 | 150 |
| 12                    | 0.0403           | 0.0218     | 0.1243           | 0.0207     | 0.1646         | 0.0201 | 0.2447              | 0.1196        | 0.3925                 | 0.192            | 60.42  | 57.204 | 6.431 | 1  | 5.61E-03 | 150 |
| 13                    | 0.0151           | 0.0158     | 0.1487           | 0.0222     | 0.1638         | 0.0191 | 0.0924              | 0.0949        | 0.1481                 | 0.152            | 57.911 | 57.204 | 1.413 | 1  | 1.17E-01 | 150 |
| 14                    | 0.0453           | 0.0227     | 0.1190           | 0.0200     | 0.1643         | 0.0205 | 0.2755              | 0.1217        | 0.4419                 | 0.195            | 61.495 | 57.204 | 8.582 | 1  | 1.70E-03 | 150 |
| 15                    | 0.0066           | 0.0123     | 0.1579           | 0.0218     | 0.1645         | 0.0191 | 0.0401              | 0.0746        | 0.0643                 | 0.120            | 57.4   | 57.204 | 0.392 | 1  | 2.66E-01 | 150 |
| 16                    | 0.0004           | 0.0112     | 0.1646           | 0.0224     | 0.1650         | 0.0191 | 0.0026              | 0.0678        | 0.0042                 | 0.109            | 57.205 | 57.204 | 0.001 | 1  | 4.86E-01 | 150 |
| 17                    | 0.0399           | 0.0210     | 0.1233           | 0.0204     | 0.1632         | 0.0198 | 0.2446              | 0.1166        | 0.3924                 | 0.187            | 60.886 | 57.204 | 7.363 | 1  | 3.33E-03 | 150 |
| 18                    | 0.0519           | 0.0247     | 0.1142           | 0.0201     | 0.1661         | 0.0212 | 0.3127              | 0.1277        | 0.5016                 | 0.205            | 61.803 | 57.204 | 9.196 | 1  | 1.21E-03 | 150 |
| 19                    | 0.0118           | 0.0125     | 0.1516           | 0.0207     | 0.1634         | 0.0190 | 0.0722              | 0.0756        | 0.1157                 | 0.121            | 58.157 | 57.204 | 1.906 | 1  | 8.37E-02 | 150 |
| 20                    | 0.0235           | 0.0182     | 0.1410           | 0.0217     | 0.1645         | 0.0194 | 0.1430              | 0.1064        | 0.2294                 | 0.171            | 58.593 | 57.204 | 2.778 | 1  | 4.78E-02 | 150 |
| 21                    | 0.0860           | 0.0330     | 0.0953           | 0.0199     | 0.1813         | 0.0257 | 0.4743              | 0.1344        | 0.7608                 | 0.216            | 61.468 | 57.204 | 8.527 | 1  | 1.75E-03 | 150 |
| 22                    | 0.0241           | 0.0196     | 0.1417           | 0.0223     | 0.1658         | 0.0197 | 0.1453              | 0.1135        | 0.2331                 | 0.182            | 58.062 | 57.204 | 1.716 | 1  | 9.51E-02 | 150 |
| 23                    | 0                | 0.010      | 0.165            | 0.022      | 0.165          | 0.019  | 1.00E-06            | 0.063         | 2.00E-06               | 0.100            | 57.204 | 57.204 | 0     | 1  | 5.00E-01 | 150 |

| Chromosome/Region | V(G)<br>Variance | V(G)<br>SE | V(e)<br>Variance | V(e)<br>SE | Vp<br>Variance | Vp SE | V(G)/Vp<br>Variance | V(G)/Vp<br>SE | V(G)/Vp_<br>L Variance | V(G)/Vp_<br>L SE | LogL   | LogL0  | LRT    | df | Pval     | n   |
|-------------------|------------------|------------|------------------|------------|----------------|-------|---------------------|---------------|------------------------|------------------|--------|--------|--------|----|----------|-----|
| 24                | 0.040            | 0.021      | 0.120            | 0.019      | 0.161          | 0.020 | 0.251               | 0.114         | 0.403                  | 0.183            | 63.024 | 57.204 | 11.64  | 1  | 3.23E-04 | 150 |
| 25                | 0.018            | 0.016      | 0.146            | 0.021      | 0.164          | 0.019 | 0.108               | 0.096         | 0.173                  | 0.154            | 58.304 | 57.204 | 2.199  | 1  | 6.91E-02 | 150 |
| 26                | 0.009            | 0.014      | 0.156            | 0.022      | 0.165          | 0.019 | 0.052               | 0.082         | 0.083                  | 0.132            | 57.469 | 57.204 | 0.529  | 1  | 2.33E-01 | 150 |
| 27                | 0.064            | 0.022      | 0.093            | 0.017      | 0.157          | 0.020 | 0.407               | 0.113         | 0.653                  | 0.181            | 68.222 | 57.204 | 22.035 | 1  | 1.34E-06 | 150 |
| 28                | 0.019            | 0.020      | 0.147            | 0.024      | 0.166          | 0.019 | 0.113               | 0.118         | 0.181                  | 0.189            | 57.48  | 57.204 | 0.552  | 1  | 2.29E-01 | 150 |
| 29                | 0.013            | 0.015      | 0.151            | 0.022      | 0.164          | 0.019 | 0.079               | 0.092         | 0.127                  | 0.147            | 57.74  | 57.204 | 1.072  | 1  | 1.50E-01 | 150 |
| 30                | 0.011            | 0.015      | 0.154            | 0.022      | 0.165          | 0.019 | 0.066               | 0.088         | 0.106                  | 0.141            | 57.528 | 57.204 | 0.648  | 1  | 2.10E-01 | 150 |
| 31                | 0.015            | 0.015      | 0.149            | 0.022      | 0.164          | 0.019 | 0.090               | 0.091         | 0.144                  | 0.146            | 58.026 | 57.204 | 1.643  | 1  | 9.99E-02 | 150 |
| 32                | 0.014            | 0.015      | 0.150            | 0.022      | 0.164          | 0.019 | 0.083               | 0.092         | 0.134                  | 0.148            | 57.767 | 57.204 | 1.126  | 1  | 1.44E-01 | 150 |
| 33                | 0.009            | 0.016      | 0.156            | 0.024      | 0.165          | 0.019 | 0.052               | 0.098         | 0.084                  | 0.157            | 57.324 | 57.204 | 0.239  | 1  | 3.12E-01 | 150 |
| 34                | 0                | 0.012      | 0.163            | 0.021      | 0.163          | 0.019 | 1.00E-06            | 0.074         | 2.00E-06               | 0.119            | 57.197 | 57.204 | 0      | 1  | 5.00E-01 | 150 |
| 35                | 0.007            | 0.012      | 0.158            | 0.021      | 0.164          | 0.019 | 0.040               | 0.070         | 0.064                  | 0.113            | 57.489 | 57.204 | 0.569  | 1  | 2.25E-01 | 150 |
| 36                | 0.015            | 0.015      | 0.148            | 0.021      | 0.163          | 0.019 | 0.091               | 0.088         | 0.146                  | 0.141            | 58.373 | 57.204 | 2.337  | 1  | 6.32E-02 | 150 |
| 37                | 0.029            | 0.021      | 0.136            | 0.022      | 0.165          | 0.020 | 0.174               | 0.119         | 0.278                  | 0.191            | 58.552 | 57.204 | 2.695  | 1  | 5.03E-02 | 150 |
| 38                | 0.021            | 0.017      | 0.142            | 0.021      | 0.163          | 0.019 | 0.129               | 0.100         | 0.207                  | 0.160            | 58.902 | 57.204 | 3.395  | 1  | 3.27E-02 | 150 |
| All chromosomes   | 0.161            | 0.042      | 0.000            | 0.033      | 0.161          | 0.020 | 1.000               | 0.205         | 1.604                  | 0.329            | 68.16  | 57.204 | 21.911 | 1  | 1.43E-06 | 150 |
| Chr 18, 37-56Mb   | 0.069            | 0.027      | 0.099            | 0.017      | 0.168          | 0.023 | 0.409               | 0.121         | 0.656                  | 0.194            | 66.625 | 57.204 | 18.842 | 1  | 7.10E-06 | 150 |
| Chr 18, 38-42Mb   | 0.035            | 0.020      | 0.128            | 0.016      | 0.164          | 0.023 | 0.216               | 0.102         | 0.347                  | 0.164            | 65.627 | 57.204 | 16.845 | 1  | 2.03E-05 | 150 |
| Chr 27, 1-9Mb     | 0.039            | 0.017      | 0.112            | 0.016      | 0.151          | 0.019 | 0.261               | 0.096         | 0.419                  | 0.154            | 69.838 | 57.204 | 25.268 | 1  | 2.50E-07 | 150 |
| Chr 27, 5-6Mb     | 0.025            | 0.014      | 0.130            | 0.016      | 0.154          | 0.020 | 0.160               | 0.082         | 0.257                  | 0.131            | 67.45  | 57.204 | 20.492 | 1  | 2.99E-06 | 150 |
| Chr 27, 5-9Mb     | 0.033            | 0.016      | 0.122            | 0.016      | 0.154          | 0.020 | 0.210               | 0.088         | 0.338                  | 0.141            | 67.666 | 57.204 | 20.923 | 1  | 2.39E-06 | 150 |

## (B) Prevalence 0.05

| Chromosome/Region | V(G)<br>Variance | V(G)<br>SE | V(e)<br>Variance | V(e)<br>SE | Vp<br>Variance | Vp<br>SE | V(G)/Vp<br>Variance | V(G)/Vp<br>SE | V(G)/Vp_L<br>Variance | V(G)/Vp_L<br>SE | LogL   | LogL0  | LRT   | df | Pval     | n   |
|-------------------|------------------|------------|------------------|------------|----------------|----------|---------------------|---------------|-----------------------|-----------------|--------|--------|-------|----|----------|-----|
| 1                 | 0.014            | 0.019      | 0.151            | 0.025      | 0.165          | 0.019    | 0.083               | 0.116         | 0.107                 | 0.150           | 57.425 | 57.204 | 0.441 | 1  | 2.53E-01 | 150 |
| 2                 | 0.023            | 0.021      | 0.142            | 0.024      | 0.165          | 0.019    | 0.138               | 0.122         | 0.179                 | 0.158           | 58.08  | 57.204 | 1.751 | 1  | 9.29E-02 | 150 |
| 3                 | 0.049            | 0.026      | 0.119            | 0.022      | 0.168          | 0.021    | 0.292               | 0.138         | 0.378                 | 0.178           | 59.781 | 57.204 | 5.153 | 1  | 1.16E-02 | 150 |
| 4                 | 0.010            | 0.016      | 0.154            | 0.023      | 0.164          | 0.019    | 0.062               | 0.095         | 0.081                 | 0.123           | 57.451 | 57.204 | 0.494 | 1  | 2.41E-01 | 150 |
| 5                 | 0.049            | 0.025      | 0.115            | 0.022      | 0.165          | 0.020    | 0.300               | 0.136         | 0.388                 | 0.176           | 60.232 | 57.204 | 6.056 | 1  | 6.93E-03 | 150 |
| 6                 | 0.014            | 0.017      | 0.151            | 0.023      | 0.165          | 0.019    | 0.083               | 0.099         | 0.108                 | 0.128           | 57.668 | 57.204 | 0.927 | 1  | 1.68E-01 | 150 |
| 7                 | 0.037            | 0.024      | 0.129            | 0.023      | 0.165          | 0.020    | 0.222               | 0.133         | 0.287                 | 0.172           | 58.88  | 57.204 | 3.35  | 1  | 3.36E-02 | 150 |
| 8                 | 0.008            | 0.014      | 0.156            | 0.022      | 0.164          | 0.019    | 0.051               | 0.082         | 0.065                 | 0.106           | 57.504 | 57.204 | 0.6   | 1  | 2.19E-01 | 150 |
| 9                 | 0.000            | 0.012      | 0.165            | 0.023      | 0.165          | 0.019    | 0.002               | 0.073         | 0.003                 | 0.095           | 57.205 | 57.204 | 0.001 | 1  | 4.88E-01 | 150 |
| 10                | 0.009            | 0.013      | 0.155            | 0.022      | 0.164          | 0.019    | 0.054               | 0.081         | 0.070                 | 0.105           | 57.592 | 57.204 | 0.776 | 1  | 1.89E-01 | 150 |
| 11                | 0.022            | 0.019      | 0.142            | 0.023      | 0.164          | 0.019    | 0.134               | 0.111         | 0.173                 | 0.144           | 58.179 | 57.204 | 1.949 | 1  | 8.13E-02 | 150 |
| 12                | 0.040            | 0.022      | 0.124            | 0.021      | 0.165          | 0.020    | 0.245               | 0.120         | 0.317                 | 0.155           | 60.42  | 57.204 | 6.431 | 1  | 5.61E-03 | 150 |
| 13                | 0.015            | 0.016      | 0.149            | 0.022      | 0.164          | 0.019    | 0.092               | 0.095         | 0.119                 | 0.123           | 57.911 | 57.204 | 1.413 | 1  | 1.17E-01 | 150 |
| 14                | 0.045            | 0.023      | 0.119            | 0.020      | 0.164          | 0.021    | 0.275               | 0.122         | 0.356                 | 0.157           | 61.495 | 57.204 | 8.582 | 1  | 1.70E-03 | 150 |
| 15                | 0.007            | 0.012      | 0.158            | 0.022      | 0.165          | 0.019    | 0.040               | 0.075         | 0.052                 | 0.097           | 57.4   | 57.204 | 0.392 | 1  | 2.66E-01 | 150 |
| 16                | 0.000            | 0.011      | 0.165            | 0.022      | 0.165          | 0.019    | 0.003               | 0.068         | 0.003                 | 0.088           | 57.205 | 57.204 | 0.001 | 1  | 4.86E-01 | 150 |
| 17                | 0.040            | 0.021      | 0.123            | 0.020      | 0.163          | 0.020    | 0.245               | 0.117         | 0.317                 | 0.151           | 60.886 | 57.204 | 7.363 | 1  | 3.33E-03 | 150 |
| 18                | 0.052            | 0.025      | 0.114            | 0.020      | 0.166          | 0.021    | 0.313               | 0.128         | 0.405                 | 0.165           | 61.803 | 57.204 | 9.196 | 1  | 1.21E-03 | 150 |
| 19                | 0.012            | 0.013      | 0.152            | 0.021      | 0.163          | 0.019    | 0.072               | 0.076         | 0.093                 | 0.098           | 58.157 | 57.204 | 1.906 | 1  | 8.37E-02 | 150 |
| 20                | 0.024            | 0.018      | 0.141            | 0.022      | 0.164          | 0.019    | 0.143               | 0.106         | 0.185                 | 0.138           | 58.593 | 57.204 | 2.778 | 1  | 4.78E-02 | 150 |
| 21                | 0.086            | 0.033      | 0.095            | 0.020      | 0.181          | 0.026    | 0.474               | 0.134         | 0.614                 | 0.174           | 61.468 | 57.204 | 8.527 | 1  | 1.75E-03 | 150 |
| 22                | 0.024            | 0.020      | 0.142            | 0.022      | 0.166          | 0.020    | 0.145               | 0.114         | 0.188                 | 0.147           | 58.062 | 57.204 | 1.716 | 1  | 9.51E-02 | 150 |
| 23                | 0                | 0.010      | 0.165            | 0.022      | 0.165          | 0.019    | 1.00E-06            | 0.063         | 1.00E-06              | 0.081           | 57.204 | 57.204 | 0     | 1  | 5.00E-01 | 150 |
| 24                | 0.040            | 0.021      | 0.120            | 0.019      | 0.161          | 0.020    | 0.251               | 0.114         | 0.325                 | 0.147           | 63.024 | 57.204 | 11.64 | 1  | 3.23E-04 | 150 |

| Chromosome/Region | V(G)<br>Variance | V(G)<br>SE | V(e)<br>Variance | V(e)<br>SE | Vp<br>Variance | Vp<br>SE | V(G)/Vp<br>Variance | V(G)/Vp<br>SE | V(G)/Vp_L<br>Variance | V(G)/Vp_L<br>SE | LogL   | LogL0  | LRT    | df | Pval     | n   |
|-------------------|------------------|------------|------------------|------------|----------------|----------|---------------------|---------------|-----------------------|-----------------|--------|--------|--------|----|----------|-----|
| 25                | 0.018            | 0.016      | 0.146            | 0.021      | 0.164          | 0.019    | 0.108               | 0.096         | 0.140                 | 0.124           | 58.304 | 57.204 | 2.199  | 1  | 6.91E-02 | 150 |
| 26                | 0.009            | 0.014      | 0.156            | 0.022      | 0.165          | 0.019    | 0.052               | 0.082         | 0.067                 | 0.106           | 57.469 | 57.204 | 0.529  | 1  | 2.33E-01 | 150 |
| 27                | 0.064            | 0.022      | 0.093            | 0.017      | 0.157          | 0.020    | 0.407               | 0.113         | 0.527                 | 0.146           | 68.222 | 57.204 | 22.035 | 1  | 1.34E-06 | 150 |
| 28                | 0.019            | 0.020      | 0.147            | 0.024      | 0.166          | 0.019    | 0.113               | 0.118         | 0.146                 | 0.152           | 57.48  | 57.204 | 0.552  | 1  | 2.29E-01 | 150 |
| 29                | 0.013            | 0.015      | 0.151            | 0.022      | 0.164          | 0.019    | 0.079               | 0.092         | 0.103                 | 0.119           | 57.74  | 57.204 | 1.072  | 1  | 1.50E-01 | 150 |
| 30                | 0.011            | 0.015      | 0.154            | 0.022      | 0.165          | 0.019    | 0.066               | 0.088         | 0.085                 | 0.114           | 57.528 | 57.204 | 0.648  | 1  | 2.10E-01 | 150 |
| 31                | 0.015            | 0.015      | 0.149            | 0.022      | 0.164          | 0.019    | 0.090               | 0.091         | 0.116                 | 0.118           | 58.026 | 57.204 | 1.643  | 1  | 9.99E-02 | 150 |
| 32                | 0.014            | 0.015      | 0.150            | 0.022      | 0.164          | 0.019    | 0.083               | 0.092         | 0.108                 | 0.119           | 57.767 | 57.204 | 1.126  | 1  | 1.44E-01 | 150 |
| 33                | 0.009            | 0.016      | 0.156            | 0.024      | 0.165          | 0.019    | 0.052               | 0.098         | 0.068                 | 0.127           | 57.324 | 57.204 | 0.239  | 1  | 3.12E-01 | 150 |
| 34                | 0                | 0.012      | 0.163            | 0.021      | 0.163          | 0.019    | 1.00E-06            | 0.074         | 1.00E-06              | 0.096           | 57.197 | 57.204 | 0      | 1  | 5.00E-01 | 150 |
| 35                | 0.007            | 0.012      | 0.158            | 0.021      | 0.164          | 0.019    | 0.040               | 0.070         | 0.051                 | 0.091           | 57.489 | 57.204 | 0.569  | 1  | 2.25E-01 | 150 |
| 36                | 0.015            | 0.015      | 0.148            | 0.021      | 0.163          | 0.019    | 0.091               | 0.088         | 0.118                 | 0.113           | 58.373 | 57.204 | 2.337  | 1  | 6.32E-02 | 150 |
| 37                | 0.029            | 0.021      | 0.136            | 0.022      | 0.165          | 0.020    | 0.174               | 0.119         | 0.225                 | 0.154           | 58.552 | 57.204 | 2.695  | 1  | 5.03E-02 | 150 |
| 38                | 0.021            | 0.017      | 0.142            | 0.021      | 0.163          | 0.019    | 0.129               | 0.100         | 0.167                 | 0.129           | 58.902 | 57.204 | 3.395  | 1  | 3.27E-02 | 150 |
| All               | 0.161            | 0.042      | 0                | 0.033      | 0.161          | 0.020    | 1.000               | 0.205         | 1.294                 | 0.266           | 68.16  | 57.204 | 21.911 | 1  | 1.43E-06 | 150 |
| Chr 18, 37-56Mb   | 0.069            | 0.027      | 0.099            | 0.017      | 0.168          | 0.023    | 0.409               | 0.121         | 0.529                 | 0.157           | 66.625 | 57.204 | 18.842 | 1  | 7.10E-06 | 150 |
| Chr 18, 38-42Mb   | 0.035            | 0.020      | 0.128            | 0.016      | 0.164          | 0.023    | 0.216               | 0.102         | 0.280                 | 0.132           | 65.627 | 57.204 | 16.845 | 1  | 2.03E-05 | 150 |
| Chr 27, 1-9Mb     | 0.039            | 0.017      | 0.112            | 0.016      | 0.151          | 0.019    | 0.261               | 0.096         | 0.338                 | 0.124           | 69.838 | 57.204 | 25.268 | 1  | 2.50E-07 | 150 |
| Chr 27, 5-6Mb     | 0.025            | 0.014      | 0.130            | 0.016      | 0.154          | 0.020    | 0.160               | 0.082         | 0.207                 | 0.106           | 67.45  | 57.204 | 20.492 | 1  | 2.99E-06 | 150 |
| Chr 27, 5-9Mb     | 0.033            | 0.016      | 0.122            | 0.016      | 0.154          | 0.020    | 0.210               | 0.088         | 0.272                 | 0.114           | 67.666 | 57.204 | 20.923 | 1  | 2.39E-06 | 150 |



## Supplementary Data S2 (continued)

## (C) Prevalence 0.025

| Chromosome/Region | V(G)<br>Variance | V(G)<br>SE | V(e)<br>Variance | V(e)<br>SE | Vp<br>Variance | Vp<br>SE | V(G)/Vp<br>Variance | V(G)/Vp<br>SE | V(G)/Vp_L<br>Variance | V(G)/Vp_L<br>SE | LogL   | LogL0  | LRT   | df | Pval     | n   |
|-------------------|------------------|------------|------------------|------------|----------------|----------|---------------------|---------------|-----------------------|-----------------|--------|--------|-------|----|----------|-----|
| 1                 | 0.014            | 0.019      | 0.151            | 0.025      | 0.165          | 0.019    | 0.083               | 0.116         | 0.088                 | 0.123           | 57.425 | 57.204 | 0.441 | 1  | 2.53E-01 | 150 |
| 2                 | 0.023            | 0.021      | 0.142            | 0.024      | 0.165          | 0.019    | 0.138               | 0.122         | 0.147                 | 0.129           | 58.08  | 57.204 | 1.751 | 1  | 9.29E-02 | 150 |
| 3                 | 0.049            | 0.026      | 0.119            | 0.022      | 0.168          | 0.021    | 0.292               | 0.138         | 0.310                 | 0.146           | 59.781 | 57.204 | 5.153 | 1  | 1.16E-02 | 150 |
| 4                 | 0.010            | 0.016      | 0.154            | 0.023      | 0.164          | 0.019    | 0.062               | 0.095         | 0.066                 | 0.101           | 57.451 | 57.204 | 0.494 | 1  | 2.41E-01 | 150 |
| 5                 | 0.049            | 0.025      | 0.115            | 0.022      | 0.165          | 0.020    | 0.300               | 0.136         | 0.318                 | 0.145           | 60.232 | 57.204 | 6.056 | 1  | 6.93E-03 | 150 |
| 6                 | 0.014            | 0.017      | 0.151            | 0.023      | 0.165          | 0.019    | 0.083               | 0.099         | 0.088                 | 0.105           | 57.668 | 57.204 | 0.927 | 1  | 1.68E-01 | 150 |
| 7                 | 0.037            | 0.024      | 0.129            | 0.023      | 0.165          | 0.020    | 0.222               | 0.133         | 0.235                 | 0.141           | 58.88  | 57.204 | 3.35  | 1  | 3.36E-02 | 150 |
| 8                 | 0.008            | 0.014      | 0.156            | 0.022      | 0.164          | 0.019    | 0.051               | 0.082         | 0.054                 | 0.087           | 57.504 | 57.204 | 0.6   | 1  | 2.19E-01 | 150 |
| 9                 | 0.000            | 0.012      | 0.165            | 0.023      | 0.165          | 0.019    | 0.002               | 0.073         | 0.002                 | 0.078           | 57.205 | 57.204 | 0.001 | 1  | 4.88E-01 | 150 |
| 10                | 0.009            | 0.013      | 0.155            | 0.022      | 0.164          | 0.019    | 0.054               | 0.081         | 0.057                 | 0.086           | 57.592 | 57.204 | 0.776 | 1  | 1.89E-01 | 150 |
| 11                | 0.022            | 0.019      | 0.142            | 0.023      | 0.164          | 0.019    | 0.134               | 0.111         | 0.142                 | 0.118           | 58.179 | 57.204 | 1.949 | 1  | 8.13E-02 | 150 |
| 12                | 0.040            | 0.022      | 0.124            | 0.021      | 0.165          | 0.020    | 0.245               | 0.120         | 0.260                 | 0.127           | 60.42  | 57.204 | 6.431 | 1  | 5.61E-03 | 150 |
| 13                | 0.015            | 0.016      | 0.149            | 0.022      | 0.164          | 0.019    | 0.092               | 0.095         | 0.098                 | 0.101           | 57.911 | 57.204 | 1.413 | 1  | 1.17E-01 | 150 |
| 14                | 0.045            | 0.023      | 0.119            | 0.020      | 0.164          | 0.021    | 0.275               | 0.122         | 0.292                 | 0.129           | 61.495 | 57.204 | 8.582 | 1  | 1.70E-03 | 150 |
| 15                | 0.007            | 0.012      | 0.158            | 0.022      | 0.165          | 0.019    | 0.040               | 0.075         | 0.043                 | 0.079           | 57.4   | 57.204 | 0.392 | 1  | 2.66E-01 | 150 |
| 16                | 0.000            | 0.011      | 0.165            | 0.022      | 0.165          | 0.019    | 0.003               | 0.068         | 0.003                 | 0.072           | 57.205 | 57.204 | 0.001 | 1  | 4.86E-01 | 150 |
| 17                | 0.040            | 0.021      | 0.123            | 0.020      | 0.163          | 0.020    | 0.245               | 0.117         | 0.260                 | 0.124           | 60.886 | 57.204 | 7.363 | 1  | 3.33E-03 | 150 |
| 18                | 0.052            | 0.025      | 0.114            | 0.020      | 0.166          | 0.021    | 0.313               | 0.128         | 0.332                 | 0.135           | 61.803 | 57.204 | 9.196 | 1  | 1.21E-03 | 150 |
| 19                | 0.012            | 0.013      | 0.152            | 0.021      | 0.163          | 0.019    | 0.072               | 0.076         | 0.077                 | 0.080           | 58.157 | 57.204 | 1.906 | 1  | 8.37E-02 | 150 |
| 20                | 0.024            | 0.018      | 0.141            | 0.022      | 0.164          | 0.019    | 0.143               | 0.106         | 0.152                 | 0.113           | 58.593 | 57.204 | 2.778 | 1  | 4.78E-02 | 150 |
| 21                | 0.086            | 0.033      | 0.095            | 0.020      | 0.181          | 0.026    | 0.474               | 0.134         | 0.503                 | 0.143           | 61.468 | 57.204 | 8.527 | 1  | 1.75E-03 | 150 |
| 22                | 0.024            | 0.020      | 0.142            | 0.022      | 0.166          | 0.020    | 0.145               | 0.114         | 0.154                 | 0.120           | 58.062 | 57.204 | 1.716 | 1  | 9.51E-02 | 150 |
| 23                | 0                | 0.010      | 0.165            | 0.022      | 0.165          | 0.019    | 1.00E-06            | 0.063         | 1.00E-06              | 0.066426        | 57.204 | 57.204 | 0     | 1  | 5.00E-01 | 150 |

| Chromosome/Region | V(G)<br>Variance | V(G)<br>SE | V(e)<br>Variance | V(e)<br>SE | Vp<br>Variance | Vp<br>SE | V(G)/Vp<br>Variance | V(G)/Vp<br>SE | V(G)/Vp_L<br>Variance | V(G)/Vp_L<br>SE | LogL   | LogL0  | LRT    | df | Pval     | n   |
|-------------------|------------------|------------|------------------|------------|----------------|----------|---------------------|---------------|-----------------------|-----------------|--------|--------|--------|----|----------|-----|
| 24                | 0.040            | 0.021      | 0.120            | 0.019      | 0.161          | 0.020    | 0.251               | 0.114         | 0.266                 | 0.121           | 63.024 | 57.204 | 11.64  | 1  | 3.23E-04 | 150 |
| 25                | 0.018            | 0.016      | 0.146            | 0.021      | 0.164          | 0.019    | 0.108               | 0.096         | 0.115                 | 0.102           | 58.304 | 57.204 | 2.199  | 1  | 6.91E-02 | 150 |
| 26                | 0.009            | 0.014      | 0.156            | 0.022      | 0.165          | 0.019    | 0.052               | 0.082         | 0.055                 | 0.087           | 57.469 | 57.204 | 0.529  | 1  | 2.33E-01 | 150 |
| 27                | 0.064            | 0.022      | 0.093            | 0.017      | 0.157          | 0.020    | 0.407               | 0.113         | 0.432                 | 0.119           | 68.222 | 57.204 | 22.035 | 1  | 1.34E-06 | 150 |
| 28                | 0.019            | 0.020      | 0.147            | 0.024      | 0.166          | 0.019    | 0.113               | 0.118         | 0.120                 | 0.125           | 57.48  | 57.204 | 0.552  | 1  | 2.29E-01 | 150 |
| 29                | 0.013            | 0.015      | 0.151            | 0.022      | 0.164          | 0.019    | 0.079               | 0.092         | 0.084                 | 0.097           | 57.74  | 57.204 | 1.072  | 1  | 1.50E-01 | 150 |
| 30                | 0.011            | 0.015      | 0.154            | 0.022      | 0.165          | 0.019    | 0.066               | 0.088         | 0.070                 | 0.093           | 57.528 | 57.204 | 0.648  | 1  | 2.10E-01 | 150 |
| 31                | 0.015            | 0.015      | 0.149            | 0.022      | 0.164          | 0.019    | 0.090               | 0.091         | 0.095                 | 0.097           | 58.026 | 57.204 | 1.643  | 1  | 9.99E-02 | 150 |
| 32                | 0.014            | 0.015      | 0.150            | 0.022      | 0.164          | 0.019    | 0.083               | 0.092         | 0.088                 | 0.098           | 57.767 | 57.204 | 1.126  | 1  | 1.44E-01 | 150 |
| 33                | 0.009            | 0.016      | 0.156            | 0.024      | 0.165          | 0.019    | 0.052               | 0.098         | 0.056                 | 0.104           | 57.324 | 57.204 | 0.239  | 1  | 3.12E-01 | 150 |
| 34                | 0                | 0.012      | 0.163            | 0.021      | 0.163          | 0.019    | 1.00E-06            | 0.074         | 1.00E-06              | 0.079           | 57.197 | 57.204 | 0      | 1  | 5.00E-01 | 150 |
| 35                | 0.007            | 0.012      | 0.158            | 0.021      | 0.164          | 0.019    | 0.040               | 0.070         | 0.042                 | 0.074           | 57.489 | 57.204 | 0.569  | 1  | 2.25E-01 | 150 |
| 36                | 0.015            | 0.015      | 0.148            | 0.021      | 0.163          | 0.019    | 0.091               | 0.088         | 0.097                 | 0.093           | 58.373 | 57.204 | 2.337  | 1  | 6.32E-02 | 150 |
| 37                | 0.029            | 0.021      | 0.136            | 0.022      | 0.165          | 0.020    | 0.174               | 0.119         | 0.184                 | 0.126           | 58.552 | 57.204 | 2.695  | 1  | 5.03E-02 | 150 |
| 38                | 0.021            | 0.017      | 0.142            | 0.021      | 0.163          | 0.019    | 0.129               | 0.100         | 0.137                 | 0.106           | 58.902 | 57.204 | 3.395  | 1  | 3.27E-02 | 150 |
| All               | 0.161            | 0.042      | 0                | 0.033      | 0.161          | 0.020    | 1.000               | 0.205         | 1.061                 | 0.218           | 68.16  | 57.204 | 21.911 | 1  | 1.43E-06 | 150 |
| Chr 18, 37-56Mb   | 0.069            | 0.027      | 0.099            | 0.017      | 0.168          | 0.023    | 0.409               | 0.121         | 0.434                 | 0.128           | 66.625 | 57.204 | 18.842 | 1  | 7.10E-06 | 150 |
| Chr 18, 38-42Mb   | 0.035            | 0.020      | 0.128            | 0.016      | 0.164          | 0.023    | 0.216               | 0.102         | 0.229                 | 0.108           | 65.627 | 57.204 | 16.845 | 1  | 2.03E-05 | 150 |
| Chr 27, 1-9Mb     | 0.039            | 0.017      | 0.112            | 0.016      | 0.151          | 0.019    | 0.261               | 0.096         | 0.277                 | 0.102           | 69.838 | 57.204 | 25.268 | 1  | 2.50E-07 | 150 |
| Chr 27, 5-6Mb     | 0.025            | 0.014      | 0.130            | 0.016      | 0.154          | 0.020    | 0.160               | 0.082         | 0.170                 | 0.087           | 67.45  | 57.204 | 20.492 | 1  | 2.99E-06 | 150 |
| Chr 27, 5-9Mb     | 0.033            | 0.016      | 0.122            | 0.016      | 0.154          | 0.020    | 0.210               | 0.088         | 0.223                 | 0.093           | 67.666 | 57.204 | 20.923 | 1  | 2.39E-06 | 150 |
| Chr 27, 8-9Mb     | 0.025            | 0.015      | 0.134            | 0.016      | 0.159          | 0.021    | 0.156               | 0.084         | 0.166                 | 0.089           | 65.208 | 57.204 | 16.008 | 1  | 3.15E-05 | 150 |

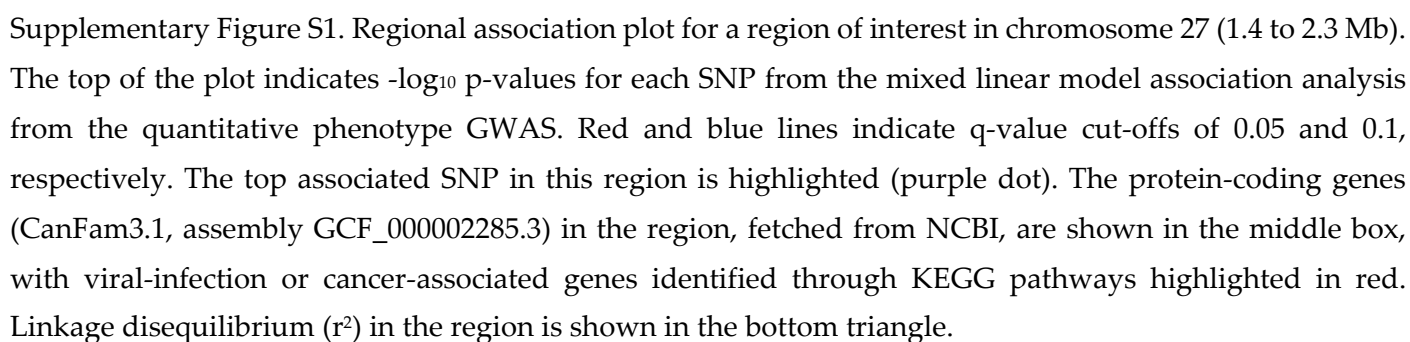

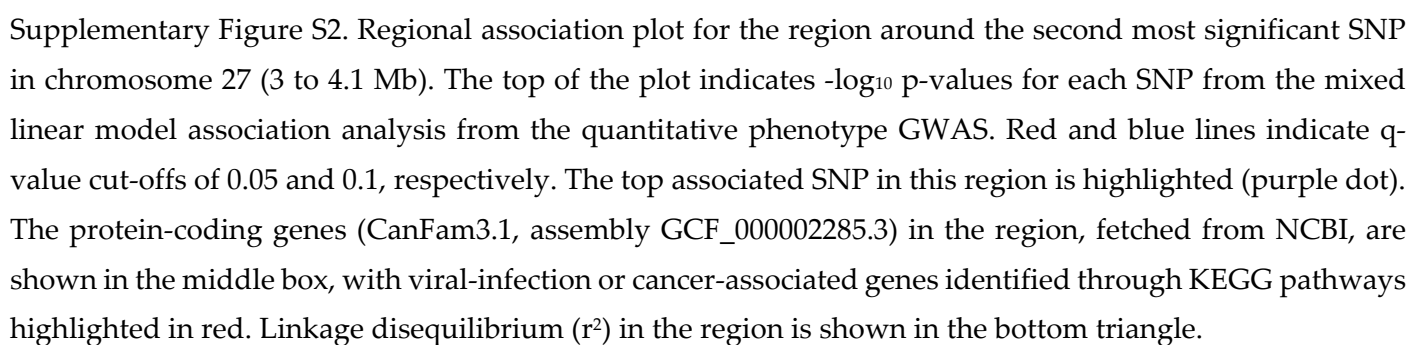

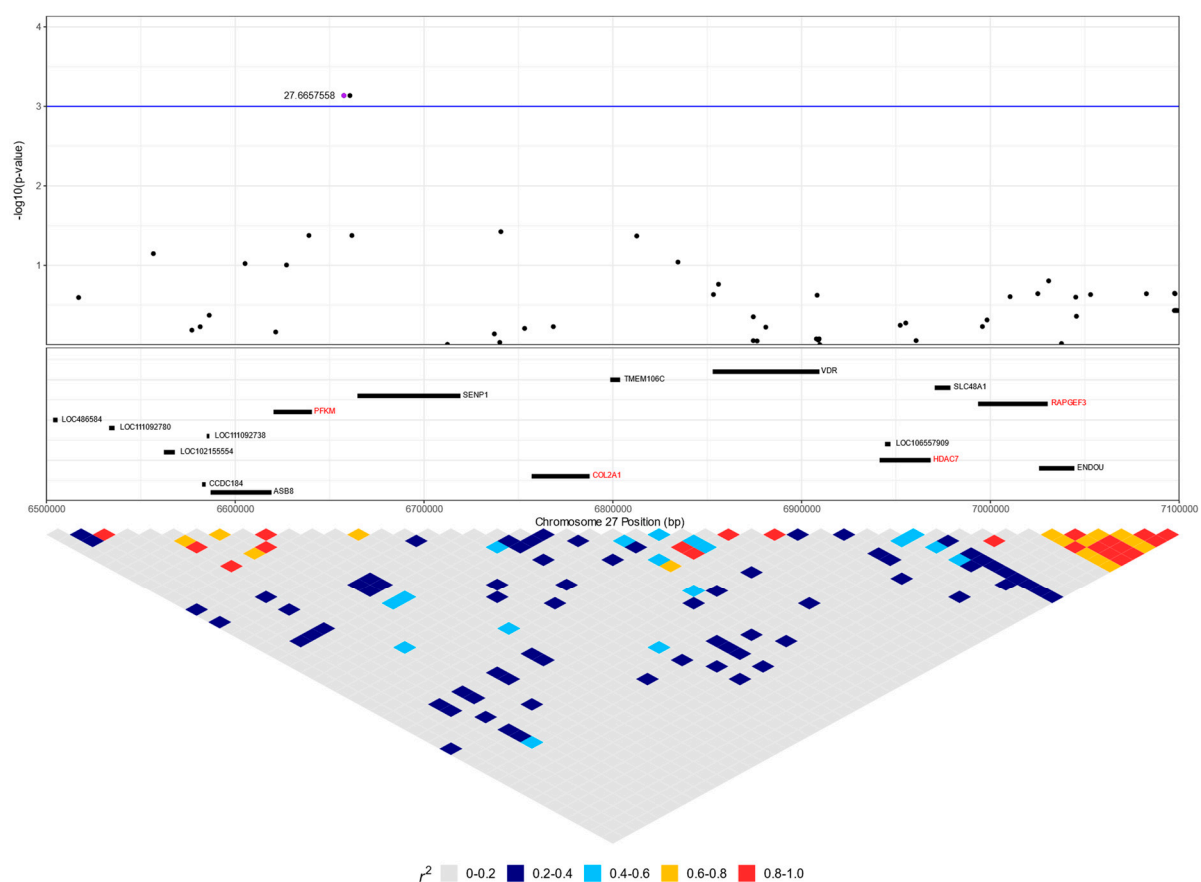

Supplementary Figure S3. Regional association plot for a region of interest in chromosome 27 (6 to 7.1 Mb). The top of the plot indicates  $-\log_{10}$  p-values for each SNP from the mixed linear model association analysis from the quantitative phenotype GWAS. The blue line indicates a q-value cut-off of 0.1. The top associated SNP in this region is highlighted (purple dot). The protein-coding genes (CanFam3.1, assembly GCF\_000002285.3) in the region, fetched from NCBI, are shown in the middle box, with viral-infection or cancer-associated genes identified through KEGG pathways highlighted in red. Linkage disequilibrium ( $r^2$ ) in the region is shown in the bottom triangle.

Supplementary Table S1. Linear discriminant analysis output from a backwards stepwise regression between cases and controls for the top 100 SNPs in the mixed linear model analysis using a quantitative phenotype. A model with the top 100 SNPs is also included for comparison. A total of 54 SNPs (bold) were in common with those retained from the stepwise regression of the top 100 SNPs from the binary phenotype GWAS. DF = degrees of freedom.

| Model                   | Top 100 SNPs          | Backwards step regression |
|-------------------------|-----------------------|---------------------------|
| No. of SNPs             | 100                   | 74                        |
| Residual standard error | 0.1615 on 6 DF        | 0.1013 on 16 DF           |
| Multiple R <sup>2</sup> | 0.9936                | 0.9933                    |
| Adjusted R <sup>2</sup> | 0.8421                | 0.9379                    |
| F-statistic             | 6.556 on 143 and 6 DF | 17.91 on 133 and 16 DF    |
| p-value                 | 0.0117                | 3.79E-08                  |
| SNPs                    | 2:80997329            | <b>2:80997329</b>         |
|                         | 2:81324749            | <b>2:81324749</b>         |
|                         | 2:81332407            |                           |
|                         | 3:7977474             | 3:7977474                 |
|                         | 3:67414463            | 3:67414463                |
|                         | 3:71632869            | <b>3:71632869</b>         |
|                         | 3:71640698            |                           |
|                         | 3:71691367            | 3:71691367                |
|                         | 5:9379432             | 5:9379432                 |
|                         | 5:9499753             | <b>5:9499753</b>          |
|                         | 7:63218541            | 7:63218541                |
|                         | 7:67274886            | <b>7:67274886</b>         |
|                         | 7:67526042            | 7:67526042                |
|                         | 9:34803797            | <b>9:34803797</b>         |
|                         | 9:35274622            | 9:35274622                |
|                         | 9:49959123            | 9:49959123                |
|                         | 12:27717563           | 12:27717563               |
|                         | 12:35491860           |                           |
|                         | 12:35507522           | <b>12:35507522</b>        |
|                         | 12:35527747           | <b>12:35527747</b>        |
|                         | 12:69769664           | 12:69769664               |
|                         | 13:17399337           | <b>13:17399337</b>        |
|                         | 13:18910196           | <b>13:18910196</b>        |
|                         | 13:18913685           |                           |
|                         | 13:20734477           |                           |
|                         | 14:3672303            | 14:3672303                |
|                         | 14:3673803            |                           |
|                         | 14:3693671            |                           |

| Model | Top 100 SNPs | Backwards step regression |
|-------|--------------|---------------------------|
|       | 14:3699542   |                           |
|       | 14:3716974   |                           |
|       | 14:3738150   |                           |
|       | 14:3945297   | <b>14:3945297</b>         |
|       | 14:4095927   |                           |
|       | 14:53561013  | <b>14:53561013</b>        |
|       | 14:54260890  | <b>14:54260890</b>        |
|       | 15:47616623  | <b>15:47616623</b>        |
|       | 18:37249960  | 18:37249960               |
|       | 18:37737740  | <b>18:37737740</b>        |
|       | 18:37862012  | <b>18:37862012</b>        |
|       | 18:37867871  |                           |
|       | 18:38233567  | <b>18:38233567</b>        |
|       | 18:38326192  | 18:38326192               |
|       | 18:38350947  | <b>18:38350947</b>        |
|       | 18:38456518  |                           |
|       | 18:38502268  | <b>18:38502268</b>        |
|       | 18:38507461  |                           |
|       | 18:38510335  |                           |
|       | 18:38704682  | <b>18:38704682</b>        |
|       | 18:38719709  | <b>18:38719709</b>        |
|       | 18:39140112  | <b>18:39140112</b>        |
|       | 18:39177075  | 18:39177075               |
|       | 18:40281122  | <b>18:40281122</b>        |
|       | 18:40286669  | <b>18:40286669</b>        |
|       | 18:40418483  | <b>18:40418483</b>        |
|       | 18:40653765  | <b>18:40653765</b>        |
|       | 18:40667579  |                           |
|       | 18:41229735  | <b>18:41229735</b>        |
|       | 18:41436427  | <b>18:41436427</b>        |
|       | 18:41854962  | <b>18:41854962</b>        |
|       | 18:55380537  | 18:55380537               |
|       | 21:37837424  | <b>21:37837424</b>        |
|       | 21:37847374  |                           |
|       | 21:39045733  |                           |
|       | 21:39068050  |                           |
|       | 21:39080288  |                           |
|       | 22:15750444  | 22:15750444               |
|       | 22:39139988  | <b>22:39139988</b>        |
|       | 22:39523927  | <b>22:39523927</b>        |

| Model | Top 100 SNPs | Backwards step regression |
|-------|--------------|---------------------------|
|       | 22:40039487  | <b>22:40039487</b>        |
|       | 24:40229170  | <b>24:40229170</b>        |
|       | 25:15529304  | <b>25:15529304</b>        |
|       | 27:1953293   | 27:1953293                |
|       | 27:3054141   | 27:3054141                |
|       | 27:3154712   | <b>27:3154712</b>         |
|       | 27:3197949   | <b>27:3197949</b>         |
|       | 27:3234647   | <b>27:3234647</b>         |
|       | 27:3501246   | <b>27:3501246</b>         |
|       | 27:3594560   | 27:3594560                |
|       | 27:5112245   | <b>27:5112245</b>         |
|       | 27:5364442   | <b>27:5364442</b>         |
|       | 27:5467028   | <b>27:5467028</b>         |
|       | 27:5603116   | <b>27:5603116</b>         |
|       | 27:8331252   | <b>27:8331252</b>         |
|       | 27:8646723   | <b>27:8646723</b>         |
|       | 27:8767784   | <b>27:8767784</b>         |
|       | 27:8842830   | <b>27:8842830</b>         |
|       | 27:8883501   | <b>27:8883501</b>         |
|       | 27:8884575   |                           |
|       | 27:8892980   |                           |
|       | 28:40578166  | 28:40578166               |
|       | 28:40672357  | <b>28:40672357</b>        |
|       | 28:40681845  | <b>28:40681845</b>        |
|       | 28:41018541  |                           |
|       | 28:41020381  |                           |
|       | 31:14627591  | <b>31:14627591</b>        |
|       | 33:22443454  | 33:22443454               |
|       | 33:23263219  |                           |
|       | 36:13452474  | <b>36:13452474</b>        |
|       | 36:13453583  |                           |
|       | 36:16411362  | <b>36:16411362</b>        |



Supplementary Table S2. Linear discriminant analysis output from a backwards stepwise regression for the top 100 SNPs in the mixed linear model analysis using a binary phenotype. A model with the top 100 SNPs is also included for comparison. A total of 54 SNPs (bold) were in common with those retained from the stepwise regression of the top 100 SNPs from the quantitative phenotype GWAS. DF = degrees of freedom.

| Model                   | Top 100 SNPs          | Backwards step regression |
|-------------------------|-----------------------|---------------------------|
| No. of SNPs             | 100                   | 79                        |
| Residual standard error | 0.1416 on 9 DF        | 0.1186 on 13 DF           |
| Multiple R <sup>2</sup> | 0.9927                | 0.9926                    |
| Adjusted R <sup>2</sup> | 0.8786                | 0.9147                    |
| F-statistic             | 8.701 on 140 and 9 DF | 12.75 on 136 and 13 DF    |
| p-value                 | 7.03E-04              | 5.35E-06                  |
| SNPs                    | 2:80997329            | <b>2:80997329</b>         |
|                         | 2:81324749            | <b>2:81324749</b>         |
|                         | 2:81332407            |                           |
|                         | 3:71632869            | <b>3:71632869</b>         |
|                         | 3:71640698            |                           |
|                         | 3:71691367            | <b>3:71691367</b>         |
|                         | 3:77341029            | 3:77341029                |
|                         | 5:9499753             | <b>5:9499753</b>          |
|                         | 5:14836517            | 5:14836517                |
|                         | 7:67274886            | <b>7:67274886</b>         |
|                         | 9:34803797            | <b>9:34803797</b>         |
|                         | 10:1868661            | 10:1868661                |
|                         | 10:2493438            |                           |
|                         | 12:33397646           | 12:33397646               |
|                         | 12:35491860           | 12:35491860               |
|                         | 12:35507522           | <b>12:35507522</b>        |
|                         | 12:35527747           | <b>12:35527747</b>        |
|                         | 13:17399337           | <b>13:17399337</b>        |
|                         | 13:18910196           | <b>13:18910196</b>        |
|                         | 13:18913685           |                           |
|                         | 13:20734477           | 13:20734477               |
|                         | 13:20995480           | 13:20995480               |
|                         | 13:20998820           |                           |
|                         | 14:628308             | 14:628308                 |
|                         | 14:779271             | 14:779271                 |
|                         | 14:3945297            | <b>14:3945297</b>         |
|                         | 14:4095927            |                           |
|                         | 14:53561013           | <b>14:53561013</b>        |
|                         | 14:54260890           | <b>14:54260890</b>        |
|                         | 15:47616623           | <b>15:47616623</b>        |

|  |             |                    |
|--|-------------|--------------------|
|  | 17:51052810 | 17:51052810        |
|  | 18:37737740 | <b>18:37737740</b> |
|  | 18:37862012 | <b>18:37862012</b> |
|  | 18:37867871 |                    |
|  | 18:38233567 | <b>18:38233567</b> |
|  | 18:38350947 | <b>18:38350947</b> |
|  | 18:38456518 |                    |
|  | 18:38502268 | <b>18:38502268</b> |
|  | 18:38507461 |                    |
|  | 18:38510335 |                    |
|  | 18:38704682 | <b>18:38704682</b> |
|  | 18:38719709 | <b>18:38719709</b> |
|  | 18:39140112 | <b>18:39140112</b> |
|  | 18:39727438 | 18:39727438        |
|  | 18:40281122 | <b>18:40281122</b> |
|  | 18:40286669 | <b>18:40286669</b> |
|  | 18:40418483 | <b>18:40418483</b> |
|  | 18:40653765 | <b>18:40653765</b> |
|  | 18:40667579 |                    |
|  | 18:41229735 | <b>18:41229735</b> |
|  | 18:41436427 | <b>18:41436427</b> |
|  | 18:41713196 | 18:41713196        |
|  | 18:41726488 | 18:41726488        |
|  | 18:41854962 | <b>18:41854962</b> |
|  | 18:42270324 | 18:42270324        |
|  | 21:37837424 | <b>21:37837424</b> |
|  | 21:37847374 |                    |
|  | 21:39045733 | 21:39045733        |
|  | 21:39068050 |                    |
|  | 21:39080288 |                    |
|  | 21:39399551 |                    |
|  | 21:39409009 |                    |
|  | 22:39139988 | <b>22:39139988</b> |
|  | 22:39523927 | <b>22:39523927</b> |
|  | 22:40039487 | <b>22:40039487</b> |
|  | 24:34542285 | 24:34542285        |
|  | 24:40229170 | <b>24:40229170</b> |
|  | 25:15529304 | <b>25:15529304</b> |
|  | 26:36337542 | 26:36337542        |
|  | 27:3154712  | <b>27:3154712</b>  |
|  | 27:3197949  | <b>27:3197949</b>  |
|  | 27:3234647  | <b>27:3234647</b>  |

|  |             |                    |
|--|-------------|--------------------|
|  | 27:3501246  | <b>27:3501246</b>  |
|  | 27:3594560  |                    |
|  | 27:5112245  | <b>27:5112245</b>  |
|  | 27:5364442  | <b>27:5364442</b>  |
|  | 27:5467028  | <b>27:5467028</b>  |
|  | 27:5478927  | 27:5478927         |
|  | 27:5512765  | 27:5512765         |
|  | 27:5603116  | <b>27:5603116</b>  |
|  | 27:5806033  | 27:5806033         |
|  | 27:5817551  |                    |
|  | 27:5822515  |                    |
|  | 27:7188905  | 27:7188905         |
|  | 27:8331252  | <b>27:8331252</b>  |
|  | 27:8646723  | <b>27:8646723</b>  |
|  | 27:8767784  | <b>27:8767784</b>  |
|  | 27:8842830  | <b>27:8842830</b>  |
|  | 27:8883501  | <b>27:8883501</b>  |
|  | 27:8884575  |                    |
|  | 27:8892980  | 27:8892980         |
|  | 27:11672173 | 27:11672173        |
|  | 28:28639313 | 28:28639313        |
|  | 28:40672357 | <b>28:40672357</b> |
|  | 28:40681845 | <b>28:40681845</b> |
|  | 28:40998474 | 28:40998474        |
|  | 31:14627591 | <b>31:14627591</b> |
|  | 36:13452474 | <b>36:13452474</b> |
|  | 36:13453583 |                    |
|  | 36:16411362 | <b>36:16411362</b> |
